# Supplementary material for: The impact of A-site cations on the crystal structure and magnetism of the new double perovskites ALaCoTeO6 (A = Na and K)
Source: Royal Society of Chemistry journal article supplement (doi:10.1039/d3dt04016j), 2024-01-01
Supplement: d3dt04016j1.pdf [file d3dt04016j1.pdf]

Supporting information for

**The impact of A-site cation on the crystal structure and magnetism of the new double perovskites  $A\text{LaCoTeO}_6$  ( $A = \text{Na}$  and  $\text{K}$ )**

Haoyu Wu, Zhilin Fang, Pengfei Jiang,\* and Tao Yang\*

College of Chemistry and Chemical Engineering, Chongqing University, Chongqing 401331, China.

\*Corresponding authors: pengfeijiang@cqu.edu.cn; taoyang@cqu.edu.cn.

**Table S1** Crystallographic Data for  $ALaCoTeO_6$  (A = K and Na) from Rietveld Refinement against PXRD and ND Data.

| formula                       | parameters              |                        |           |
|-------------------------------|-------------------------|------------------------|-----------|
|                               | KLaCoTeO <sub>6</sub>   | NaLaCoTeO <sub>6</sub> |           |
| temperature (K)               | 298                     | 298                    |           |
| source                        | Cu K <sub>α1</sub>      | Cu K <sub>α1</sub>     | neutron   |
| wavelength (Å)                | 1.5406                  | 1.5406                 | 1.622     |
| Space group (no.)             | <i>P4/nmm</i> (no. 129) | <i>I</i> -1 (no. 1)    |           |
| <i>d</i> -spacing range (Å)   | 0.89–9.0                | 0.82–8.8               | 0.82–10.0 |
| <i>a</i> (Å)                  | 5.62355(2)              | 5.5864(7)              |           |
| <i>b</i> (Å)                  | 5.62355(2)              | 7.8751(9)              |           |
| <i>c</i> (Å)                  | 7.98442(5)              | 5.5676(1)              |           |
| $\alpha$ (°)                  | 90                      | 90.345(5)              |           |
| $\beta$ (°)                   | 90                      | 89.934(3)              |           |
| $\gamma$ (°)                  | 90                      | 90.0403(9)             |           |
| cell volume (Å <sup>3</sup> ) | 252.502(3)              | 244.85(1)              |           |
| <i>Z</i>                      | 2                       | 2                      |           |
| <i>R</i> <sub>wp</sub> (%)    | 2.10                    | 1.78                   | 4.30      |
| <i>R</i> <sub>p</sub> (%)     | 1.56                    | 1.37                   | 3.39      |
| <i>R</i> <sub>exp</sub> (%)   | 1.50                    | 1.05                   | 2.91      |
| $\chi^2$                      | 1.40                    | 1.69                   | 1.48      |

**Table S2.** The Co–O and Te–O bond distances in KLaCoTeO<sub>6</sub> and NaLaCoTeO<sub>6</sub>.

| KLaCoTeO <sub>6</sub> |          | NaLaCoTeO <sub>6</sub> |          |
|-----------------------|----------|------------------------|----------|
| Co–O3 × 2             | 1.93(2)  | Co–O1                  | 1.96(1)  |
| Co–O2 × 2             | 2.087(8) | Co–O3 × 4              | 2.068(3) |
| Co–O1 × 2             | 2.13(2)  | Co–O2                  | 2.18(1)  |
| <Co–O>                | 2.05(2)  | <Co–O>                 | 2.069(5) |
| Te–O1 × 2             | 1.84(1)  | Te–O2                  | 1.91(1)  |
| Te–O2 × 2             | 1.912(9) | Te–O1                  | 1.94(1)  |
| Te–O3 × 2             | 2.08(2)  | Te–O3 × 4              | 1.939(4) |
| <Te–O>                | 1.94(1)  | <Te–O>                 | 1.934(6) |

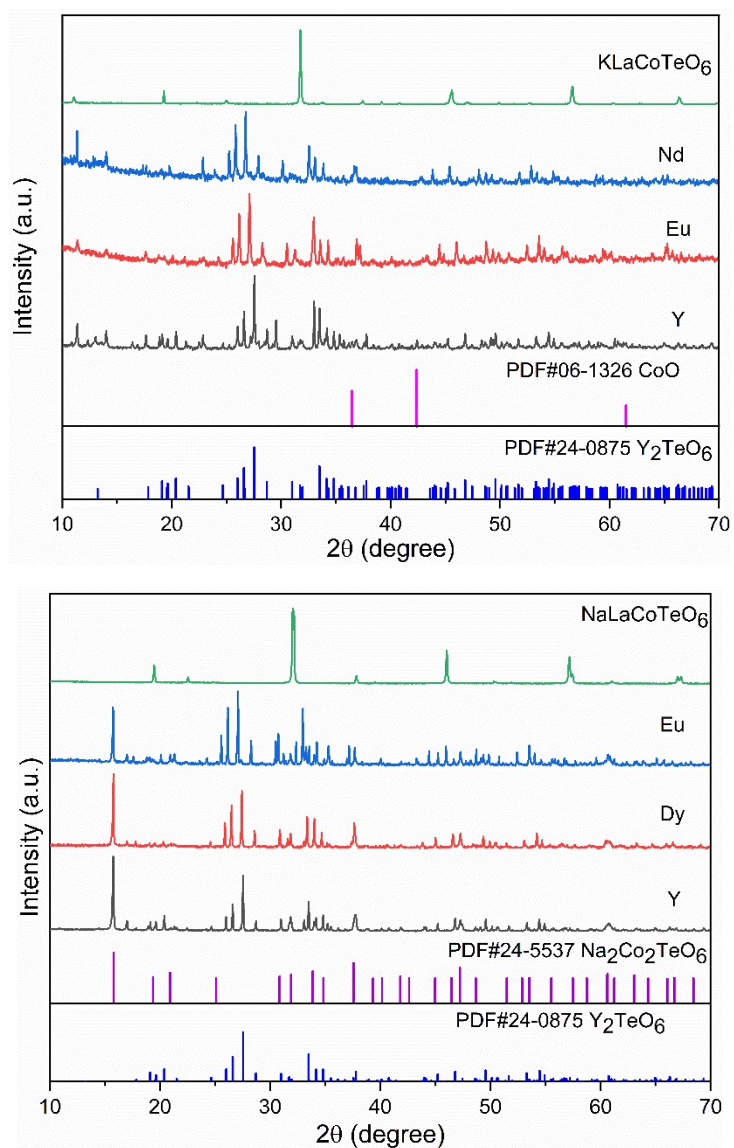

**Fig. S1** XRPD patterns for the compositions of  $\text{KLnCoTeO}_6$  (Ln = La, Nd, Eu, Y) and  $\text{NaLnCoTeO}_6$  (Ln = La, Eu, Dy, Y).

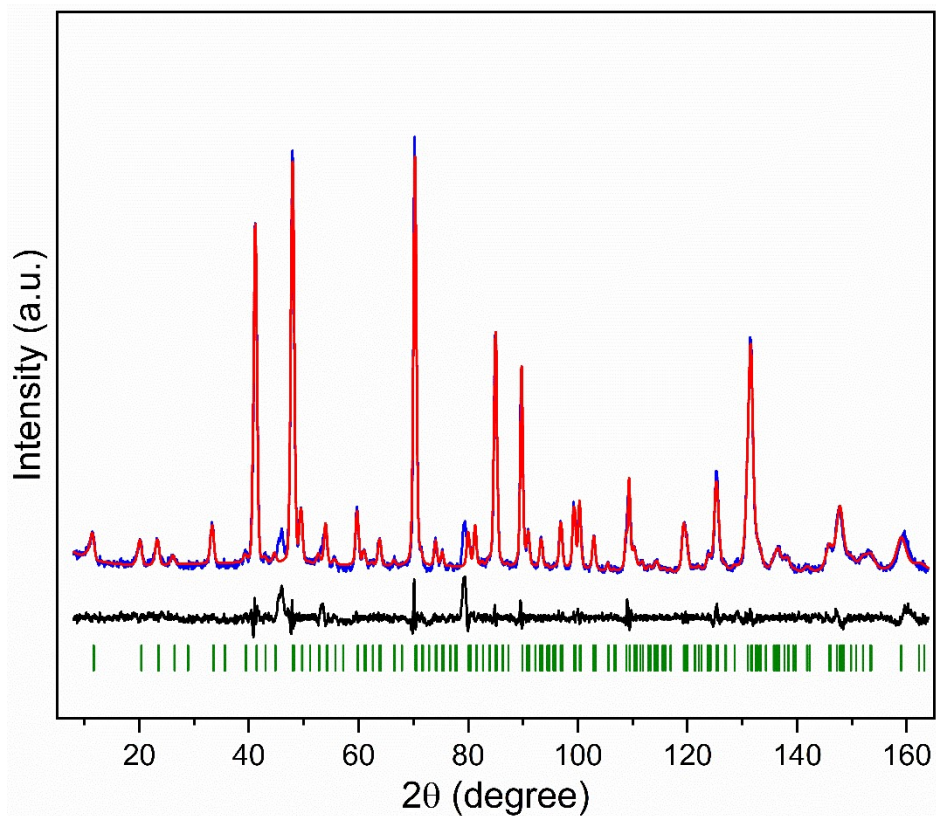

Fig. S2 Le-Bail fitting to the NPD data of KLaCoTeO<sub>6</sub> using the space group *P4/nmm*.

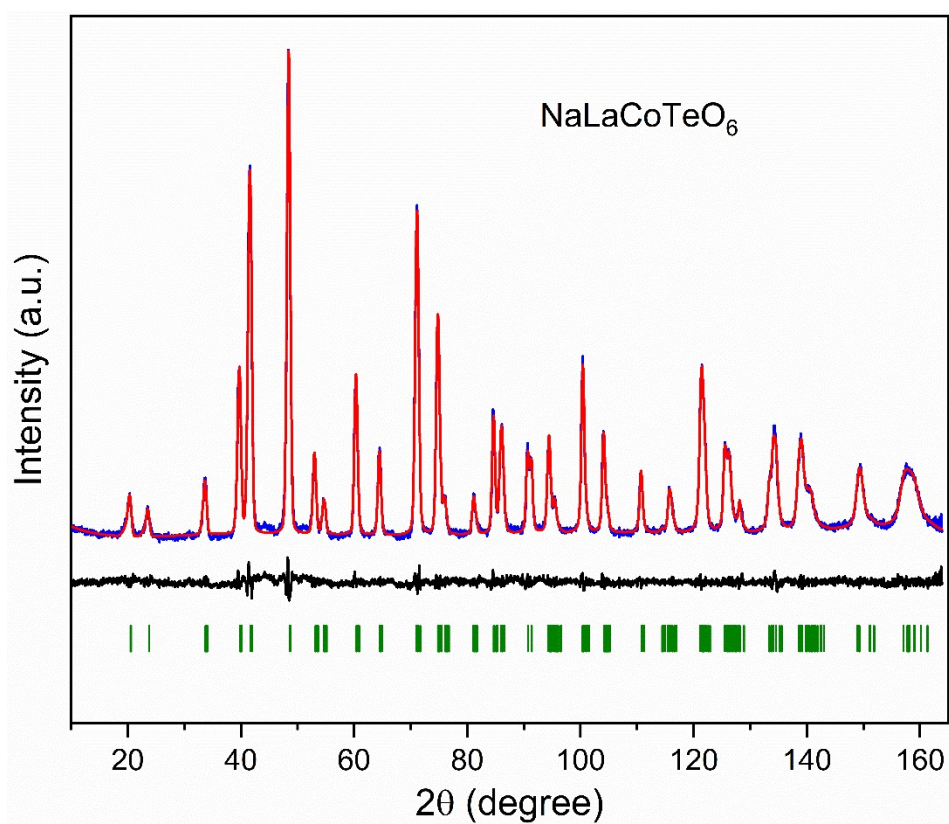

Fig. S3 Le-Bail fitting to the NPD data of NaLaCoTeO<sub>6</sub> using the space group *I2/m*.

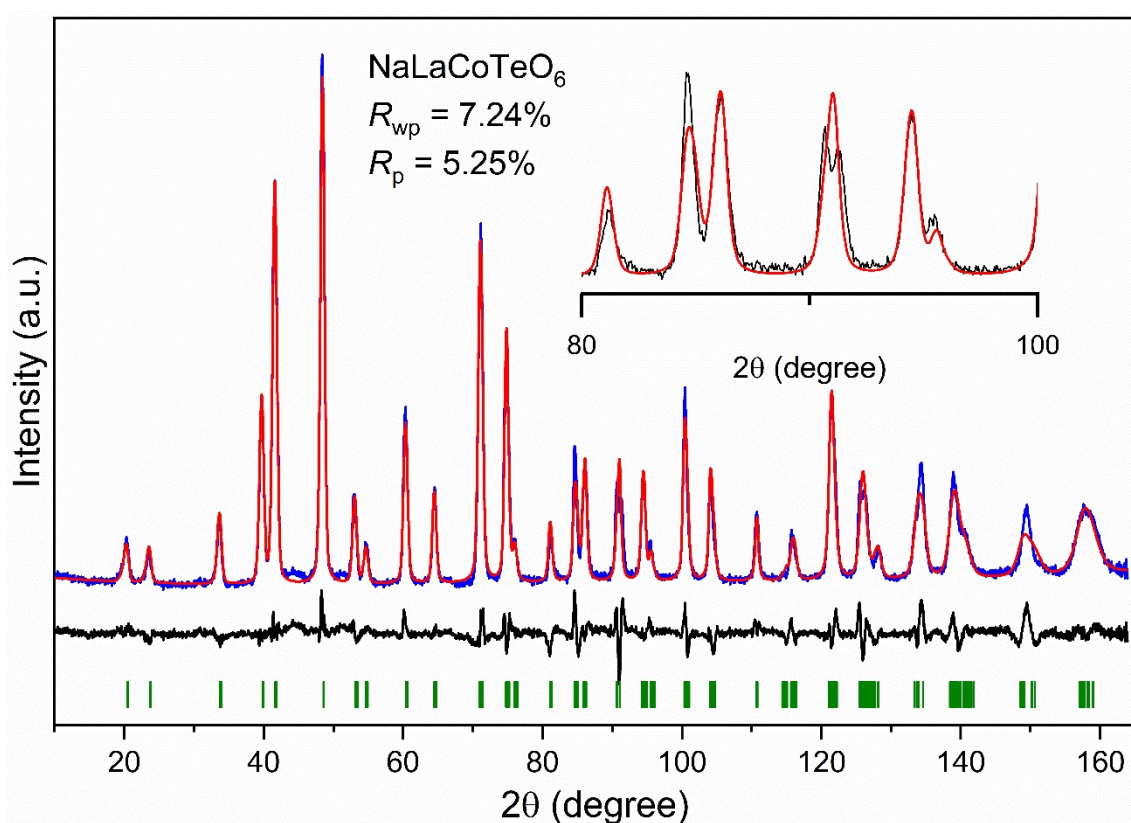

**Fig. S4** Rietveld refinement plots of NPD data for NaLaCoTeO<sub>6</sub>. The blue, red, and black solid lines indicate the observed, calculated, and difference curves, respectively. The expected Bragg positions are presented as green bars at the bottom of the pattern.

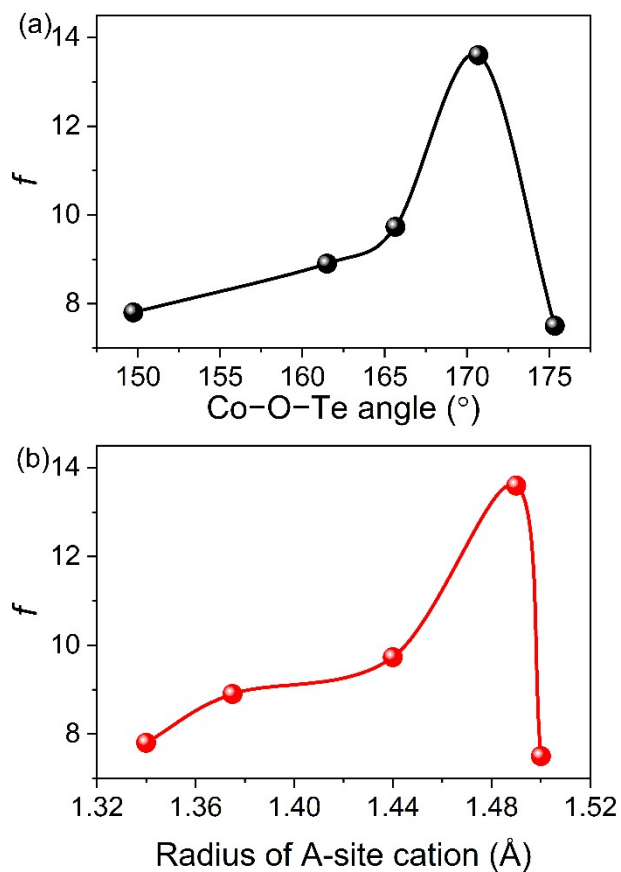

**Fig. S5** Plots of the frustration factor as a function of average Co-O-Te bond angle (a) and radius of A-site cation radius (b).
